# Supplementary material for: Predictors of splenic artery embolization as an adjunct to non-operative management of stable blunt splenic injury: a multi-institutional study
Source: PubMed Central journal article supplement — Trauma Surg Acute Care Open. 2019 Jul 12;4(1):e000323. doi: 10.1136/tsaco-2019-000323 (PMC6660800; doi:10.1136/tsaco-2019-000323), 2019-07-12
Supplement: tsaco-2019-000323supp001.pdf [file tsaco-2019-000323supp001.pdf]

**Supplementary table 1. Outcomes by definitive nonoperative management (NOM) strategy and blunt splenic injury grade**

| Outcome, n (%)                | <u>Grades I and II</u> |               | <u>Grade III</u>      |               | <u>Grade IV</u>       |               | <u>Grade V</u>       |               |
|-------------------------------|------------------------|---------------|-----------------------|---------------|-----------------------|---------------|----------------------|---------------|
|                               | Observation<br>(n=201) | SAE<br>(n=14) | Observation<br>(n=92) | SAE<br>(n=34) | Observation<br>(n=30) | SAE<br>(n=33) | Observation<br>(n=2) | SAE<br>(n=11) |
| Mortality                     | 4 (2.0)                | 2 (14.3)*     | 4 (4.4)               | 9 (0)         | 1 (3.3)               | 1 (3.0)       | 0 (0)                | 0 (0)         |
| ICU admission                 | 152 (75.6)             | 14 (100)*     | 78 (84.8)             | 33 (97.1)*    | 27 (90.0)             | 33 (100)*     | 2 (100)              | 10 (90.9)     |
| # blood products <sup>a</sup> | 5 (3-12)               | 1.5 (1-3)*    | 2 (2-6)               | 2 (2-6)       | 2.5 (1-8)             | 4.5 (3-6)     | 1 (1-1)              | 5 (2-9.5)*    |
| Hospital LOS <sup>a</sup>     | 6 (3-11)               | 9 (5-16)**    | 5 (3-10)              | 11 (4-14)**   | 5 (4-7)               | 8 (5-14)*     | 5 (4-6)              | 7 (4-11)      |
| ICU LOS <sup>a</sup>          | 2 (1-5)                | 7.5 (2-15)**  | 2 (1-4)               | 4 (2-7)**     | 3 (1.5-4.5)           | 4 (3-9)**     | 2.5 (2-3)            | 4 (2-6)       |
| Failed NOM                    | 0 (0)                  | 0 (0)         | 4 (4.4)               | 0 (0)         | 0 (0)                 | 1 (3.0)       | 0 (0)                | 0 (0)         |

SAE, splenic artery embolization; ICU, intensive care unit.

<sup>a</sup>Data presented as median, interquartile range

\*P < 0.20; \*\* P < 0.05.
