# Supplementary material for: Predictors of splenic artery embolization as an adjunct to non-operative management of stable blunt splenic injury: a multi-institutional study
Source: PubMed Central journal article supplement — Trauma Surg Acute Care Open. 2019 Jul 12;4(1):e000323. doi: 10.1136/tsaco-2019-000323 (PMC6660800; doi:10.1136/tsaco-2019-000323), 2019-07-12
Supplement: tsaco-2019-000323supp002.pdf [file tsaco-2019-000323supp002.pdf]

**Supplementary Table 2.** Nonoperative management guidelines of stable blunt splenic injury

| <b>Source of guideline</b> | <b>High grade IV/V injury</b>                      | <b>Contrast Blush</b>                                            | <b>Pseudoaneurysm</b> | <b>Moderate/large hemoperitoneum</b> |
|----------------------------|----------------------------------------------------|------------------------------------------------------------------|-----------------------|--------------------------------------|
| Hospital A                 | Angio + consider embo                              | Consider angio                                                   | Consider angio        |                                      |
| Hospital B                 |                                                    | Consider angio                                                   | Consider angio        |                                      |
| Hospital C                 | Angio + consider embo                              | Consider angio (grade I-II); Angio + consider embo (Grade III-V) |                       |                                      |
| Hospital D                 | Angio + consider embo                              | Angio + consider embo                                            | Angio + consider embo |                                      |
| Hospital E                 |                                                    | Angio + consider embo                                            | Angio + consider embo |                                      |
| Hospital F                 | Angio + consider embo                              | Consider angio (grade I-II); Angio + consider embo (Grade III-V) |                       |                                      |
| EAST guideline             | Consider angio                                     | Consider angio                                                   | Consider angio        | Consider angio                       |
| WTA guideline              | Angio + consider embo (blush), else consider angio | Consider angio                                                   |                       |                                      |
| WJES guideline             | Angio + consider embo                              | Consider angio                                                   | Consider angio        |                                      |

Angio, angiography; Embo, embolization; WTA: Western Trauma Association; EAST, Eastern Association for the Surgery of Trauma; WJES, World Journal of Emergency Surgery.
